# Supplementary material for: A quantitative label-free analysis of the extracellular proteome of human supraspinatus tendon reveals damage to the pericellular and elastic fibre niches in torn and aged tissue
Source: PubMed Central journal article supplement (PMC5436668; doi:10.1371/journal.pone.0177656), 2017-05-18
Supplement: pone.0177656.s001.pdf [file pone.0177656.s001.pdf]

**MATRIX SCIENCE MASCOT Search Results**

**Protein View: sp|Q99372-2|ELN\_RAT**

**Isoform 2 of Elastin OS=Rattus norvegicus GN=Eln**

Database: UPR\_RattusNorvegicus  
 Score: 2093  
 Nominal mass (M<sub>r</sub>): 69230  
 Calculated pI: 10.44

Sequence similarity is available as [an NCBI BLAST search of sp|Q99372-2|ELN\\_RAT against nr.](#)

**Search parameters**

Enzyme: No enzyme cleavage specificity.  
 Fixed modifications: **Carbamidomethyl (C)**  
 Variable modifications: **Oxidation (P), Oxidation (K), Lys->Alllysine (K)**

**Protein sequence coverage: 57%**

Matched peptides shown in **bold red**.

1 MAGLTAAPVQ PGLLLILLN LLHPAQPQGV PG**AVPGGVP** GLPGGVPGGV  
 51 YYPGAGIGGG LGGGALGPGG KPPKPGAGLL **GAFGAGPGL** GGAGPGAGLS  
**101 YASRPGGVLP** PGGGAGAAA YKAAAKA**GAG** LGGIGGVPGG VGVGGVPGAV  
 151 **GVGGVPGAVG** GIGGIGGLGV **STGAVPQLG** AGVGA**GGKPG** KVPGVGLPGV  
 201 YPGGVLP**GTG** **ARFPGVGLP** **GVPTGTGVKA** KVPGGGGAF **SEIPGVGPFG**  
 251 **GQPGVPLGV** PIKAPKLPAG AGGGVLP**GV** **GGGIPGGAG** AIPGIGGITG  
 301 **AGTPAAAAA** KAAAKAAKYG **AGGLVPGGP** **GVKVPGAGIP** GVGIPGVGGI  
 351 PGVGGIPGVG GIPGVGGPGI GPGIVGGPG AVSPAAAAA AAKAAKYGAR  
 401 GGVGIPT**YGV** **GAGGFPYGV** **GAGAGLGGAS** QAAAAAAAK AAKYGAGGAG  
 451 TLGGLVPGAV **PGALPGAVPG** **ALPGAVPGAL** **PGAVPGVPT** **GGVPGAGTPA**  
 501 AAAAAAAKA AAKA**GQYGLG** **PGVGGVPGGV** **GVGGLPGGVG** **PGVGTIGITG**  
 551 **PGTGLVPGDL** **GGAGTPAAK** SAAKAAAKA**Q** YRAA**AGL**GAG VPLGVGAGV  
 601 **PGFGAGAGGF** **GAGAGVPGFG** **AGAVPGLAA** SKAAKYGAAG **GLGGPGLGG**  
 651 **PGGLGGPGGF** **GGPGGLGGVP** **GGVAGGAPAA** AAAAAAAKA **AQYGLGGAGG**  
 701 **LGAGGLGAGG** **LGAGGLGAGG** **LGAGGLGAGG** **VIPGAVLGG** **VSPAAAAKAA**  
 751 KYGA**AGLGGV** **LGARPPFGG** **VAARPGFGLS** **PIYPPGGGAGG** **LGVGGKPPK**  
 801 YGGALGALGY QGGGCFGKSC GRKRK

Unformatted sequence string: **825 residues** (for pasting into other applications).

Sort peptides by  Residue Number  Increasing Mass  Decreasing Mass

| Query       | Start - End      | Observed        | M <sub>r</sub> (expt) | M <sub>r</sub> (calc) | ppm           | M        | Score      | Expect         | Rank     | W        | Peptide                                      |
|-------------|------------------|-----------------|-----------------------|-----------------------|---------------|----------|------------|----------------|----------|----------|----------------------------------------------|
| <b>7427</b> | <b>33 - 50</b>   | <b>730.4008</b> | <b>1458.7870</b>      | <b>1458.7831</b>      | <b>2.62</b>   | <b>0</b> | <b>26</b>  | <b>0.12</b>    | <b>1</b> | <b>U</b> | <b>G.AVPGGVPGLPGGVPGGV.Y + Oxidation (P)</b> |
| <b>3914</b> | <b>37 - 50</b>   | <b>560.3115</b> | <b>1118.6084</b>      | <b>1118.6085</b>      | <b>-0.078</b> | <b>0</b> | <b>65</b>  | <b>0.00081</b> | <b>1</b> | <b>U</b> | <b>G.GVPGGLPGGVPGGV.Y</b>                    |
| <b>3916</b> | <b>37 - 50</b>   | <b>560.3120</b> | <b>1118.6093</b>      | <b>1118.6085</b>      | <b>0.80</b>   | <b>0</b> | <b>24</b>  | <b>0.18</b>    | <b>1</b> | <b>U</b> | <b>G.GVPGGLPGGVPGGV.Y</b>                    |
| <b>9484</b> | <b>79 - 100</b>  | <b>877.4682</b> | <b>1752.9218</b>      | <b>1752.9159</b>      | <b>3.39</b>   | <b>0</b> | <b>78</b>  | <b>2.1e-06</b> | <b>1</b> | <b>U</b> | <b>G.LLGAFAFGAGPGLGGAGPGAGLS.Y</b>           |
| <b>6653</b> | <b>81 - 98</b>   | <b>664.3215</b> | <b>1326.6285</b>      | <b>1326.6317</b>      | <b>-2.40</b>  | <b>0</b> | <b>22</b>  | <b>0.099</b>   | <b>1</b> | <b>U</b> | <b>L.GAFGAGPGLGGAGPGAGL.L</b>                |
| <b>7853</b> | <b>81 - 100</b>  | <b>764.3790</b> | <b>1526.7434</b>      | <b>1526.7478</b>      | <b>-2.89</b>  | <b>0</b> | <b>88</b>  | <b>9.9e-08</b> | <b>1</b> | <b>U</b> | <b>L.GAFGAGPGLGGAGPGAGLS.Y</b>               |
| <b>7854</b> | <b>81 - 100</b>  | <b>764.3793</b> | <b>1526.7440</b>      | <b>1526.7478</b>      | <b>-2.49</b>  | <b>0</b> | <b>32</b>  | <b>0.03</b>    | <b>1</b> | <b>U</b> | <b>L.GAFGAGPGLGGAGPGAGLS.Y</b>               |
| <b>7855</b> | <b>81 - 100</b>  | <b>764.3795</b> | <b>1526.7444</b>      | <b>1526.7478</b>      | <b>-2.24</b>  | <b>0</b> | <b>66</b>  | <b>7.2e-05</b> | <b>1</b> | <b>U</b> | <b>L.GAFGAGPGLGGAGPGAGLS.Y</b>               |
| <b>7856</b> | <b>81 - 100</b>  | <b>764.3799</b> | <b>1526.7453</b>      | <b>1526.7478</b>      | <b>-1.61</b>  | <b>0</b> | <b>88</b>  | <b>1.5e-06</b> | <b>1</b> | <b>U</b> | <b>L.GAFGAGPGLGGAGPGAGLS.Y</b>               |
| <b>7857</b> | <b>81 - 100</b>  | <b>764.3806</b> | <b>1526.7466</b>      | <b>1526.7478</b>      | <b>-0.81</b>  | <b>0</b> | <b>48</b>  | <b>0.0004</b>  | <b>1</b> | <b>U</b> | <b>L.GAFGAGPGLGGAGPGAGLS.Y</b>               |
| <b>7858</b> | <b>81 - 100</b>  | <b>764.3811</b> | <b>1526.7477</b>      | <b>1526.7478</b>      | <b>-0.086</b> | <b>0</b> | <b>87</b>  | <b>7.9e-06</b> | <b>1</b> | <b>U</b> | <b>L.GAFGAGPGLGGAGPGAGLS.Y</b>               |
| <b>7859</b> | <b>81 - 100</b>  | <b>764.3816</b> | <b>1526.7486</b>      | <b>1526.7478</b>      | <b>0.55</b>   | <b>0</b> | <b>109</b> | <b>6.1e-08</b> | <b>1</b> | <b>U</b> | <b>L.GAFGAGPGLGGAGPGAGLS.Y</b>               |
| <b>7860</b> | <b>81 - 100</b>  | <b>764.3821</b> | <b>1526.7496</b>      | <b>1526.7478</b>      | <b>1.19</b>   | <b>0</b> | <b>27</b>  | <b>0.065</b>   | <b>1</b> | <b>U</b> | <b>L.GAFGAGPGLGGAGPGAGLS.Y</b>               |
| <b>7861</b> | <b>81 - 100</b>  | <b>764.3827</b> | <b>1526.7508</b>      | <b>1526.7478</b>      | <b>1.99</b>   | <b>0</b> | <b>57</b>  | <b>0.00028</b> | <b>1</b> | <b>U</b> | <b>L.GAFGAGPGLGGAGPGAGLS.Y</b>               |
| <b>7862</b> | <b>81 - 100</b>  | <b>764.3829</b> | <b>1526.7512</b>      | <b>1526.7478</b>      | <b>2.23</b>   | <b>0</b> | <b>118</b> | <b>8.2e-09</b> | <b>1</b> | <b>U</b> | <b>L.GAFGAGPGLGGAGPGAGLS.Y</b>               |
| <b>6552</b> | <b>83 - 99</b>   | <b>656.8343</b> | <b>1311.6540</b>      | <b>1311.6572</b>      | <b>-2.40</b>  | <b>0</b> | <b>27</b>  | <b>0.12</b>    | <b>2</b> | <b>U</b> | <b>A.FGAGPGLGGAGPGAGL.S</b>                  |
| <b>7095</b> | <b>83 - 100</b>  | <b>700.3506</b> | <b>1398.6866</b>      | <b>1398.6892</b>      | <b>-1.85</b>  | <b>0</b> | <b>41</b>  | <b>0.069</b>   | <b>1</b> | <b>U</b> | <b>A.FGAGPGLGGAGPGAGLS.Y</b>                 |
| <b>7096</b> | <b>83 - 100</b>  | <b>700.3507</b> | <b>1398.6869</b>      | <b>1398.6892</b>      | <b>-1.68</b>  | <b>0</b> | <b>25</b>  | <b>0.26</b>    | <b>1</b> | <b>U</b> | <b>A.FGAGPGLGGAGPGAGLS.Y</b>                 |
| <b>7097</b> | <b>83 - 100</b>  | <b>700.3511</b> | <b>1398.6877</b>      | <b>1398.6892</b>      | <b>-1.07</b>  | <b>0</b> | <b>57</b>  | <b>0.0016</b>  | <b>1</b> | <b>U</b> | <b>A.FGAGPGLGGAGPGAGLS.Y</b>                 |
| <b>7098</b> | <b>83 - 100</b>  | <b>700.3516</b> | <b>1398.6886</b>      | <b>1398.6892</b>      | <b>-0.46</b>  | <b>0</b> | <b>35</b>  | <b>0.22</b>    | <b>1</b> | <b>U</b> | <b>A.FGAGPGLGGAGPGAGLS.Y</b>                 |
| <b>7100</b> | <b>83 - 100</b>  | <b>700.3520</b> | <b>1398.6894</b>      | <b>1398.6892</b>      | <b>0.16</b>   | <b>0</b> | <b>64</b>  | <b>0.00018</b> | <b>1</b> | <b>U</b> | <b>A.FGAGPGLGGAGPGAGLS.Y</b>                 |
| <b>7101</b> | <b>83 - 100</b>  | <b>700.3522</b> | <b>1398.6898</b>      | <b>1398.6892</b>      | <b>0.42</b>   | <b>0</b> | <b>35</b>  | <b>0.023</b>   | <b>1</b> | <b>U</b> | <b>A.FGAGPGLGGAGPGAGLS.Y</b>                 |
| <b>7102</b> | <b>83 - 100</b>  | <b>700.3522</b> | <b>1398.6899</b>      | <b>1398.6892</b>      | <b>0.51</b>   | <b>0</b> | <b>20</b>  | <b>0.69</b>    | <b>1</b> | <b>U</b> | <b>A.FGAGPGLGGAGPGAGLS.Y</b>                 |
| <b>7620</b> | <b>101 - 117</b> | <b>743.3932</b> | <b>1484.7718</b>      | <b>1484.7736</b>      | <b>-1.19</b>  | <b>0</b> | <b>35</b>  | <b>0.053</b>   | <b>1</b> | <b>U</b> | <b>S.YASRPGGVLPVGGGAGA.A</b>                 |
| <b>7671</b> | <b>101 - 117</b> | <b>751.3923</b> | <b>1500.7700</b>      | <b>1500.7685</b>      | <b>0.99</b>   | <b>0</b> | <b>33</b>  | <b>0.34</b>    | <b>1</b> | <b>U</b> | <b>S.YASRPGGVLPVGGGAGA.A + Oxidation (P)</b> |
| <b>8049</b> | <b>101 - 118</b> | <b>778.9129</b> | <b>1555.8113</b>      | <b>1555.8107</b>      | <b>0.36</b>   | <b>0</b> | <b>39</b>  | <b>0.0061</b>  | <b>1</b> | <b>U</b> | <b>S.YASRPGGVLPVGGGAGA.A</b>                 |
| <b>8471</b> | <b>101 - 118</b> | <b>786.9116</b> | <b>1571.8087</b>      | <b>1571.8056</b>      | <b>1.95</b>   | <b>0</b> | <b>40</b>  | <b>0.0068</b>  | <b>1</b> | <b>U</b> | <b>S.YASRPGGVLPVGGGAGA.A + Oxidation (P)</b> |
| <b>5714</b> | <b>103 - 117</b> | <b>626.3439</b> | <b>1250.6732</b>      | <b>1250.6732</b>      | <b>0.028</b>  | <b>0</b> | <b>49</b>  | <b>0.0023</b>  | <b>1</b> | <b>U</b> | <b>A.SRPGGVLPVGGGAGA.A</b>                   |
| <b>5715</b> | <b>103 - 117</b> | <b>626.3441</b> | <b>1250.6737</b>      | <b>1250.6732</b>      | <b>0.42</b>   | <b>0</b> | <b>59</b>  | <b>0.003</b>   | <b>1</b> | <b>U</b> | <b>A.SRPGGVLPVGGGAGA.A</b>                   |
| <b>5716</b> | <b>103 - 117</b> | <b>626.3441</b> | <b>1250.6737</b>      | <b>1250.6732</b>      | <b>0.42</b>   | <b>0</b> | <b>52</b>  | <b>0.0008</b>  | <b>1</b> | <b>U</b> | <b>A.SRPGGVLPVGGGAGA.A</b>                   |
| <b>5717</b> | <b>103 - 117</b> | <b>626.3448</b> | <b>1250.6750</b>      | <b>1250.6732</b>      | <b>1.49</b>   | <b>0</b> | <b>38</b>  | <b>0.026</b>   | <b>1</b> | <b>U</b> | <b>A.SRPGGVLPVGGGAGA.A</b>                   |
| <b>5720</b> | <b>103 - 117</b> | <b>626.3458</b> | <b>1250.6771</b>      | <b>1250.6732</b>      | <b>3.15</b>   | <b>0</b> | <b>37</b>  | <b>0.3</b>     | <b>1</b> | <b>U</b> | <b>A.SRPGGVLPVGGGAGA.A</b>                   |
| <b>5721</b> | <b>103 - 117</b> | <b>626.3464</b> | <b>1250.6782</b>      | <b>1250.6732</b>      | <b>4.03</b>   | <b>0</b> | <b>35</b>  | <b>0.21</b>    | <b>1</b> | <b>U</b> | <b>A.SRPGGVLPVGGGAGA.A</b>                   |
| <b>5926</b> | <b>103 - 117</b> | <b>634.3423</b> | <b>1266.6701</b>      | <b>1266.6681</b>      | <b>1.63</b>   | <b>0</b> | <b>62</b>  | <b>0.0006</b>  | <b>1</b> | <b>U</b> | <b>A.SRPGGVLPVGGGAGA.A + Oxidation (P)</b>   |
| <b>5927</b> | <b>103 - 117</b> | <b>634.3439</b> | <b>1266.6733</b>      | <b>1266.6681</b>      | <b>4.14</b>   | <b>0</b> | <b>51</b>  | <b>0.0016</b>  | <b>1</b> | <b>U</b> | <b>A.SRPGGVLPVGGGAGA.A + Oxidation (P)</b>   |
| <b>6616</b> | <b>103 - 118</b> | <b>661.8624</b> | <b>1321.7103</b>      | <b>1321.7103</b>      | <b>0.027</b>  | <b>0</b> | <b>23</b>  | <b>0.24</b>    | <b>1</b> | <b>U</b> | <b>A.SRPGGVLPVGGGAGA.A</b>                   |
| <b>6617</b> | <b>103 - 118</b> | <b>661.8625</b> | <b>1321.7105</b>      | <b>1321.7103</b>      | <b>0.21</b>   | <b>0</b> | <b>26</b>  | <b>0.062</b>   | <b>1</b> | <b>U</b> | <b>A.SRPGGVLPVGGGAGA.A</b>                   |
| <b>6618</b> | <b>103 - 118</b> | <b>661.8626</b> | <b>1321.7107</b>      | <b>1321.7103</b>      | <b>0.30</b>   | <b>0</b> | <b>47</b>  | <b>0.0063</b>  | <b>1</b> | <b>U</b> | <b>A.SRPGGVLPVGGGAGA.A</b>                   |
| <b>6619</b> | <b>103 - 118</b> | <b>661.8629</b> | <b>1321.7112</b>      | <b>1321.7103</b>      | <b>0.67</b>   | <b>0</b> | <b>51</b>  | <b>0.0036</b>  | <b>1</b> | <b>U</b> | <b>A.SRPGGVLPVGGGAGA.A</b>                   |
| <b>6620</b> | <b>103 - 118</b> | <b>661.8629</b> | <b>1321.7112</b>      | <b>1321.7103</b>      | <b>0.67</b>   | <b>0</b> | <b>46</b>  | <b>0.0092</b>  | <b>1</b> | <b>U</b> | <b>A.SRPGGVLPVGGGAGA.A</b>                   |
| <b>6621</b> | <b>103 - 118</b> | <b>661.8632</b> | <b>1321.7118</b>      | <b>1321.7103</b>      | <b>1.13</b>   | <b>0</b> | <b>52</b>  | <b>0.0025</b>  | <b>1</b> | <b>U</b> | <b>A.SRPGGVLPVGGGAGA.A</b>                   |

| Query                 | Start - End | Observed  | Mr(expt)  | Mr(calc)  | ppm    | M | Score | Expect  | Rank | W | Peptide                                          |
|-----------------------|-------------|-----------|-----------|-----------|--------|---|-------|---------|------|---|--------------------------------------------------|
| <a href="#">6622</a>  | 103 - 118   | 661.8640  | 1321.7135 | 1321.7103 | 2.43   | 0 | 31    | 0.11    | 1    | 1 | A.SRPGGVLVPGGGAGAA.A                             |
| <a href="#">6698</a>  | 103 - 118   | 669.8608  | 1337.7070 | 1337.7052 | 1.36   | 0 | 47    | 0.008   | 1    | 1 | A.SRPGGVLVPGGGAGAA.A + Oxidation (P)             |
| <a href="#">6699</a>  | 103 - 118   | 669.8611  | 1337.7076 | 1337.7052 | 1.82   | 0 | 58    | 0.00027 | 1    | 1 | U.A.SRPGGVLVPGGGAGAA.A + Oxidation (P)           |
| <a href="#">6700</a>  | 103 - 118   | 669.8614  | 1337.7082 | 1337.7052 | 2.27   | 0 | 46    | 0.0051  | 1    | 1 | U.A.SRPGGVLVPGGGAGAA.A + Oxidation (P)           |
| <a href="#">5463</a>  | 128 - 143   | 612.3397  | 1222.6649 | 1222.6670 | -1.76  | 0 | 22    | 1.3     | 2    | 1 | U.A.GAGLGGTGGVPGVGV.G                            |
| <a href="#">9748</a>  | 128 - 150   | 880.9897  | 1759.9648 | 1759.9582 | 3.78   | 0 | 20    | 0.12    | 1    | 1 | U.A.GAGLGGTGGVPGVGVGVGAV.G                       |
| <a href="#">10525</a> | 128 - 152   | 967.0302  | 1932.0457 | 1932.0430 | 1.44   | 0 | 31    | 0.068   | 1    | 1 | U.A.GAGLGGTGGVPGVGVGVGAV.G + Oxidation (P)       |
| <a href="#">9314</a>  | 149 - 170   | 860.4915  | 1718.9684 | 1718.9680 | 0.22   | 0 | 34    | 0.0059  | 1    | 1 | U.G.AVGVGGVPGAVGGTGGTGLG.S                       |
| <a href="#">9315</a>  | 149 - 170   | 860.4917  | 1718.9688 | 1718.9680 | 0.50   | 0 | 64    | 3.6e-05 | 1    | 1 | U.G.AVGVGGVPGAVGGTGGTGLG.S                       |
| <a href="#">9390</a>  | 149 - 170   | 868.4871  | 1734.9596 | 1734.9629 | -1.92  | 0 | 63    | 6.6e-05 | 1    | 1 | U.G.AVGVGGVPGAVGGTGGTGLG.S + Oxidation (P)       |
| <a href="#">9391</a>  | 149 - 170   | 868.4883  | 1734.9620 | 1734.9629 | -0.52  | 0 | 32    | 0.068   | 1    | 1 | U.G.AVGVGGVPGAVGGTGGTGLG.S + Oxidation (P)       |
| <a href="#">9392</a>  | 149 - 170   | 868.4890  | 1734.9635 | 1734.9629 | 0.33   | 0 | 50    | 0.0011  | 1    | 1 | U.G.AVGVGGVPGAVGGTGGTGLG.S + Oxidation (P)       |
| <a href="#">7993</a>  | 151 - 170   | 775.4387  | 1548.8628 | 1548.8625 | 0.20   | 0 | 45    | 0.0018  | 1    | 1 | U.V.GVGGVPGAVGGTGGTGLG.S                         |
| <a href="#">7994</a>  | 151 - 170   | 775.4388  | 1548.8630 | 1548.8625 | 0.36   | 0 | 86    | 8e-07   | 1    | 1 | U.V.GVGGVPGAVGGTGGTGLG.S                         |
| <a href="#">7995</a>  | 151 - 170   | 775.4388  | 1548.8631 | 1548.8625 | 0.44   | 0 | 39    | 0.024   | 1    | 1 | U.V.GVGGVPGAVGGTGGTGLG.S                         |
| <a href="#">7997</a>  | 151 - 170   | 775.4392  | 1548.8639 | 1548.8625 | 0.91   | 0 | 91    | 2.1e-06 | 1    | 1 | U.V.GVGGVPGAVGGTGGTGLG.S                         |
| <a href="#">8000</a>  | 151 - 170   | 775.4401  | 1548.8656 | 1548.8625 | 2.01   | 0 | 31    | 0.081   | 1    | 1 | U.V.GVGGVPGAVGGTGGTGLG.S                         |
| <a href="#">8142</a>  | 151 - 170   | 783.4376  | 1564.8607 | 1564.8574 | 2.12   | 0 | 66    | 0.00035 | 1    | 1 | U.V.GVGGVPGAVGGTGGTGLG.S + Oxidation (P)         |
| <a href="#">7065</a>  | 153 - 170   | 697.3937  | 1392.7728 | 1392.7726 | 0.17   | 0 | 77    | 2.4e-05 | 1    | 1 | U.V.GVPGAVGGTGGTGLG.S                            |
| <a href="#">7066</a>  | 153 - 170   | 697.3940  | 1392.7735 | 1392.7726 | 0.69   | 0 | 91    | 2e-06   | 1    | 1 | U.V.GVPGAVGGTGGTGLG.S                            |
| <a href="#">7068</a>  | 153 - 170   | 697.3943  | 1392.7741 | 1392.7726 | 1.13   | 0 | 56    | 0.00022 | 1    | 1 | U.V.GVPGAVGGTGGTGLG.S                            |
| <a href="#">7069</a>  | 153 - 170   | 697.3944  | 1392.7743 | 1392.7726 | 1.22   | 0 | 68    | 1.5e-05 | 1    | 1 | U.V.GVPGAVGGTGGTGLG.S                            |
| <a href="#">7071</a>  | 153 - 170   | 697.3950  | 1392.7754 | 1392.7726 | 2.01   | 0 | 33    | 0.009   | 1    | 1 | U.V.GVPGAVGGTGGTGLG.S                            |
| <a href="#">7072</a>  | 153 - 170   | 697.3951  | 1392.7756 | 1392.7726 | 2.18   | 0 | 55    | 0.00056 | 1    | 1 | U.V.GVPGAVGGTGGTGLG.S                            |
| <a href="#">7155</a>  | 153 - 170   | 705.3910  | 1408.7674 | 1408.7675 | -0.040 | 0 | 40    | 0.0073  | 1    | 1 | U.V.GVPGAVGGTGGTGLG.S + Oxidation (P)            |
| <a href="#">7156</a>  | 153 - 170   | 705.3910  | 1408.7674 | 1408.7675 | -0.040 | 0 | 61    | 8e-05   | 1    | 1 | U.V.GVPGAVGGTGGTGLG.S + Oxidation (P)            |
| <a href="#">7157</a>  | 153 - 170   | 705.3915  | 1408.7684 | 1408.7675 | 0.65   | 0 | 69    | 2.6e-05 | 1    | 1 | U.V.GVPGAVGGTGGTGLG.S + Oxidation (P)            |
| <a href="#">7158</a>  | 153 - 170   | 705.3916  | 1408.7687 | 1408.7675 | 0.83   | 0 | 40    | 0.013   | 1    | 1 | U.V.GVPGAVGGTGGTGLG.S + Oxidation (P)            |
| <a href="#">7159</a>  | 153 - 170   | 705.3918  | 1408.7690 | 1408.7675 | 1.09   | 0 | 41    | 0.0048  | 1    | 1 | U.V.GVPGAVGGTGGTGLG.S + Oxidation (P)            |
| <a href="#">7889</a>  | 158 - 170   | 513.7999  | 1025.5853 | 1025.5870 | -1.63  | 0 | 52    | 0.0041  | 1    | 1 | U.G.AVGGTGGTGLG.S                                |
| <a href="#">7890</a>  | 158 - 170   | 513.8002  | 1025.5859 | 1025.5870 | -1.04  | 0 | 26    | 0.24    | 1    | 1 | U.G.AVGGTGGTGLG.S                                |
| <a href="#">7891</a>  | 158 - 170   | 513.8004  | 1025.5862 | 1025.5870 | -0.80  | 0 | 33    | 0.057   | 1    | 1 | U.G.AVGGTGGTGLG.S                                |
| <a href="#">4527</a>  | 173 - 183   | 484.2834  | 966.5523  | 966.5498  | 2.58   | 0 | 29    | 0.098   | 1    | 1 | U.T.GAVVPLGAGV.G                                 |
| <a href="#">2216</a>  | 173 - 183   | 548.3121  | 1094.6097 | 1094.6084 | 1.18   | 0 | 21    | 0.16    | 1    | 1 | U.T.GAVVPLGAGV.G                                 |
| <a href="#">3661</a>  | 173 - 185   | 377.7271  | 753.4397  | 753.4385  | 1.65   | 0 | 34    | 0.28    | 1    | 1 | U.G.AVVPLGA.G                                    |
| <a href="#">499</a>   | 174 - 181   | 455.7703  | 909.5260  | 909.5284  | -2.58  | 0 | 63    | 0.00029 | 1    | 1 | U.G.AVVPLGAGV.G                                  |
| <a href="#">1444</a>  | 174 - 183   | 455.7719  | 909.5292  | 909.5284  | 0.91   | 0 | 38    | 0.022   | 1    | 1 | U.G.AVVPLGAGV.G                                  |
| <a href="#">1446</a>  | 174 - 183   | 455.7722  | 909.5299  | 909.5284  | 1.65   | 0 | 27    | 0.18    | 1    | 1 | U.G.AVVPLGAGV.G                                  |
| <a href="#">1447</a>  | 174 - 183   | 455.7730  | 909.5314  | 909.5284  | 3.33   | 0 | 27    | 0.22    | 1    | 1 | U.G.AVVPLGAGV.G                                  |
| <a href="#">1448</a>  | 174 - 183   | 455.7730  | 909.5314  | 909.5284  | 3.33   | 0 | 27    | 0.22    | 1    | 1 | U.G.AVVPLGAGV.G                                  |
| <a href="#">3028</a>  | 174 - 185   | 519.8007  | 1037.5869 | 1037.5870 | -0.069 | 0 | 25    | 0.45    | 1    | 1 | U.G.AVVPLGAGV.G                                  |
| <a href="#">1020</a>  | 175 - 183   | 420.2519  | 838.4892  | 838.4913  | -2.50  | 0 | 23    | 0.13    | 1    | 1 | U.A.VVPLGAGV.G                                   |
| <a href="#">7831</a>  | 209 - 224   | 762.9279  | 1523.8412 | 1523.8461 | -3.21  | 0 | 24    | 0.17    | 1    | 1 | U.G.TGARFPVGVPLPGVPT.G                           |
| <a href="#">7832</a>  | 209 - 224   | 762.9283  | 1523.8421 | 1523.8461 | -2.57  | 0 | 36    | 0.017   | 1    | 1 | U.G.TGARFPVGVPLPGVPT.G                           |
| <a href="#">6921</a>  | 211 - 224   | 683.8937  | 1365.7729 | 1365.7769 | -2.91  | 0 | 39    | 0.028   | 1    | 1 | U.G.ARFPGVGVPLPGVPT.G                            |
| <a href="#">6922</a>  | 211 - 224   | 683.8942  | 1365.7738 | 1365.7769 | -2.29  | 0 | 23    | 0.16    | 1    | 1 | U.G.ARFPGVGVPLPGVPT.G                            |
| <a href="#">6923</a>  | 211 - 224   | 683.8945  | 1365.7745 | 1365.7769 | -1.75  | 0 | 34    | 0.039   | 1    | 1 | U.G.ARFPGVGVPLPGVPT.G                            |
| <a href="#">6383</a>  | 212 - 224   | 648.3751  | 1294.7356 | 1294.7398 | -3.26  | 0 | 39    | 0.019   | 1    | 1 | U.A.RFPVGVPLPGVPT.G                              |
| <a href="#">6387</a>  | 212 - 224   | 648.3752  | 1294.7358 | 1294.7398 | -3.07  | 0 | 40    | 0.049   | 1    | 1 | U.A.RFPVGVPLPGVPT.G                              |
| <a href="#">6388</a>  | 212 - 224   | 648.3752  | 1294.7359 | 1294.7398 | -2.98  | 0 | 55    | 0.0032  | 1    | 1 | U.A.RFPVGVPLPGVPT.G                              |
| <a href="#">6390</a>  | 212 - 224   | 648.3755  | 1294.7365 | 1294.7398 | -2.51  | 0 | 26    | 0.31    | 1    | 1 | U.A.RFPVGVPLPGVPT.G                              |
| <a href="#">6394</a>  | 212 - 224   | 648.3758  | 1294.7370 | 1294.7398 | -2.13  | 0 | 40    | 0.019   | 1    | 1 | U.A.RFPVGVPLPGVPT.G                              |
| <a href="#">6395</a>  | 212 - 224   | 648.3759  | 1294.7373 | 1294.7398 | -1.94  | 0 | 43    | 0.035   | 1    | 1 | U.A.RFPVGVPLPGVPT.G                              |
| <a href="#">6397</a>  | 212 - 224   | 648.3761  | 1294.7376 | 1294.7398 | -1.66  | 0 | 24    | 0.18    | 1    | 1 | U.A.RFPVGVPLPGVPT.G                              |
| <a href="#">6398</a>  | 212 - 224   | 648.3761  | 1294.7376 | 1294.7398 | -1.66  | 0 | 39    | 0.019   | 1    | 1 | U.A.RFPVGVPLPGVPT.G                              |
| <a href="#">6405</a>  | 212 - 224   | 648.3766  | 1294.7387 | 1294.7398 | -0.81  | 0 | 25    | 0.19    | 2    | 1 | U.A.RFPVGVPLPGVPT.G                              |
| <a href="#">6406</a>  | 212 - 224   | 648.3767  | 1294.7389 | 1294.7398 | -0.72  | 0 | 21    | 0.65    | 2    | 1 | U.A.RFPVGVPLPGVPT.G                              |
| <a href="#">6409</a>  | 212 - 224   | 648.3771  | 1294.7396 | 1294.7398 | -0.15  | 0 | 23    | 0.34    | 1    | 1 | U.A.RFPVGVPLPGVPT.G                              |
| <a href="#">6411</a>  | 212 - 224   | 648.3773  | 1294.7400 | 1294.7398 | 0.13   | 0 | 25    | 0.38    | 1    | 1 | U.A.RFPVGVPLPGVPT.G                              |
| <a href="#">6417</a>  | 212 - 224   | 648.3776  | 1294.7406 | 1294.7398 | 0.60   | 0 | 24    | 0.31    | 1    | 1 | U.A.RFPVGVPLPGVPT.G                              |
| <a href="#">6421</a>  | 212 - 224   | 648.3780  | 1294.7414 | 1294.7398 | 1.27   | 0 | 20    | 0.31    | 1    | 1 | U.A.RFPVGVPLPGVPT.G                              |
| <a href="#">6423</a>  | 212 - 224   | 648.3782  | 1294.7419 | 1294.7398 | 1.64   | 0 | 33    | 0.1     | 1    | 1 | U.A.RFPVGVPLPGVPT.G                              |
| <a href="#">10144</a> | 240 - 258   | 913.9766  | 1825.9387 | 1825.9363 | 1.29   | 0 | 43    | 0.0013  | 1    | 1 | U.A.FSGTLPVGVPPGGQPPVPL.G + Oxidation (P)        |
| <a href="#">8601</a>  | 242 - 258   | 796.9250  | 1591.8354 | 1591.8359 | -0.29  | 0 | 26    | 0.14    | 1    | 1 | U.S.GTLPVGVPPGGQPPVPL.G + Oxidation (P)          |
| <a href="#">8602</a>  | 242 - 258   | 796.9251  | 1591.8357 | 1591.8359 | -0.14  | 0 | 44    | 0.0025  | 1    | 1 | U.S.GTLPVGVPPGGQPPVPL.G + Oxidation (P)          |
| <a href="#">8605</a>  | 242 - 258   | 796.9255  | 1591.8365 | 1591.8359 | 0.40   | 0 | 37    | 0.039   | 1    | 1 | U.S.GTLPVGVPPGGQPPVPL.G + Oxidation (P)          |
| <a href="#">8607</a>  | 242 - 258   | 796.9257  | 1591.8369 | 1591.8359 | 0.63   | 0 | 62    | 0.00014 | 1    | 1 | U.S.GTLPVGVPPGGQPPVPL.G + Oxidation (P)          |
| <a href="#">8627</a>  | 280 - 299   | 797.4328  | 1592.8510 | 1592.8523 | -0.76  | 0 | 38    | 0.034   | 1    | 1 | U.G.VGGGTPGGAGAIPIGGIT.G + Oxidation (P)         |
| <a href="#">8719</a>  | 280 - 299   | 805.4313  | 1608.8480 | 1608.8472 | 0.51   | 0 | 35    | 0.027   | 1    | 1 | U.G.VGGGTPGGAGAIPIGGIT.G + 2 Oxidation (P)       |
| <a href="#">9180</a>  | 280 - 301   | 853.4673  | 1704.9201 | 1704.9159 | 2.47   | 0 | 24    | 0.098   | 1    | 1 | U.G.VGGGTPGGAGAIPIGGITGA.G                       |
| <a href="#">9324</a>  | 280 - 301   | 861.4605  | 1720.9065 | 1720.9108 | -2.54  | 0 | 25    | 0.043   | 1    | 1 | U.G.VGGGTPGGAGAIPIGGITGA.G + Oxidation (P)       |
| <a href="#">9325</a>  | 280 - 301   | 861.4610  | 1720.9074 | 1720.9108 | -1.97  | 0 | 23    | 0.22    | 1    | 1 | U.G.VGGGTPGGAGAIPIGGITGA.G + Oxidation (P)       |
| <a href="#">10886</a> | 280 - 305   | 1032.5426 | 2063.0707 | 2063.0648 | 2.84   | 0 | 50    | 0.0027  | 1    | 1 | U.G.VGGGTPGGAGAIPIGGITGAGTGA.A + 2 Oxidation (P) |
| <a href="#">6531</a>  | 290 - 305   | 655.3605  | 1308.7064 | 1308.7038 | 2.00   | 0 | 25    | 0.11    | 1    | 1 | U.A.GAIPGIGGITGAGTGA.A                           |
| <a href="#">6532</a>  | 290 - 305   | 655.3613  | 1308.7080 | 1308.7038 | 3.21   | 0 | 26    | 0.063   | 1    | 1 | U.A.GAIPGIGGITGAGTGA.A                           |
| <a href="#">6299</a>  | 323 - 337   | 645.3711  | 1288.7276 | 1288.7252 | 1.89   | 0 | 23    | 0.078   | 1    | 1 | U.A.GGLVPGGPGVVRVPGA.G                           |
| <a href="#">6732</a>  | 408 - 422   | 672.8140  | 1343.6135 | 1343.6147 | -0.86  | 0 | 36    | 0.07    | 1    | 1 | U.T.YGVGAGGFPGYGVGA.G + Oxidation (P)            |
| <a href="#">6734</a>  | 408 - 422   | 672.8142  | 1343.6139 | 1343.6147 | -0.59  | 0 | 21    | 0.63    | 1    | 1 | U.T.YGVGAGGFPGYGVGA.G + Oxidation (P)            |
| <a href="#">7515</a>  | 408 - 424   | 736.8448  | 1471.6751 | 1471.6732 | 1.30   | 0 | 41    | 0.0041  | 1    | 1 | U.T.YGVGAGGFPGYGVGA.G + Oxidation (P)            |
| <a href="#">10154</a> | 408 - 429   | 914.4352  | 1826.8559 | 1826.8588 | -1.58  | 0 | 28    | 0.069   | 1    | 1 | U.T.YGVGAGGFPGYGVGAGAGLGA.S + Oxidation (P)      |
| <a href="#">1136</a>  | 423 - 433   | 430.2168  | 858.4190  | 858.4195  | -0.58  |   |       |         |      |   |                                                  |

| Query                 | Start - End | Observed  | Mr(expt)  | Mr(calc)  | ppm   | M | Score | Expect  | Rank | W | Peptide                                    |
|-----------------------|-------------|-----------|-----------|-----------|-------|---|-------|---------|------|---|--------------------------------------------|
| <a href="#">2633</a>  | 459 - 470   | 503.2910  | 1004.5674 | 1004.5655 | 1.86  | 0 | 32    | 0.032   | 1    | 1 | G.AVPGALPGAVPG.A                           |
| <a href="#">2634</a>  | 459 - 470   | 503.2912  | 1004.5679 | 1004.5655 | 2.40  | 0 | 41    | 0.0034  | 1    | 1 | G.AVPGALPGAVPG.A                           |
| <a href="#">251</a>   | 463 - 470   | 341.2001  | 680.3856  | 680.3857  | -0.20 | 0 | 20    | 0.99    | 2    | 1 | G.ALPGAVPG.A                               |
| <a href="#">255</a>   | 463 - 470   | 341.2002  | 680.3858  | 680.3857  | 0.16  | 0 | 21    | 1.8     | 3    | 1 | G.ALPGAVPG.A                               |
| <a href="#">256</a>   | 463 - 470   | 341.2002  | 680.3858  | 680.3857  | 0.16  | 0 | 22    | 0.39    | 2    | 1 | G.ALPGAVPG.A                               |
| <a href="#">2796</a>  | 463 - 474   | 510.2981  | 1018.5816 | 1018.5811 | 0.50  | 0 | 32    | 0.047   | 1    | 1 | G.ALPGAVPGALPG.A                           |
| <a href="#">10170</a> | 479 - 500   | 916.4886  | 1830.9527 | 1830.9476 | 2.79  | 0 | 26    | 0.025   | 1    | 1 | G.ALPGAVPGVPGGGVPGAGTAA.A + 2 Oxidation(P) |
| <a href="#">7431</a>  | 483 - 500   | 731.3887  | 1460.7628 | 1460.7624 | 0.28  | 0 | 35    | 0.012   | 1    | 1 | G.AVPGVPGTGGVPGAGTAA.A                     |
| <a href="#">7432</a>  | 483 - 500   | 731.3898  | 1460.7650 | 1460.7624 | 1.78  | 0 | 41    | 0.0043  | 1    | 1 | G.AVPGVPGTGGVPGAGTAA.A                     |
| <a href="#">7534</a>  | 483 - 500   | 739.3878  | 1476.7610 | 1476.7573 | 2.47  | 0 | 22    | 0.19    | 1    | 1 | G.AVPGVPGTGGVPGAGTAA.A + Oxidation(P)      |
| <a href="#">7850</a>  | 515 - 532   | 763.9006  | 1525.7867 | 1525.7890 | -1.47 | 0 | 30    | 0.036   | 1    | 1 | A.GQYGLPGVGGVPGGGV.G                       |
| <a href="#">7696</a>  | 529 - 547   | 753.9154  | 1505.8163 | 1505.8214 | -2.66 | 0 | 21    | 0.13    | 1    | 1 | G.GVGGVPGVGGVPGGGV.G                       |
| <a href="#">7697</a>  | 529 - 547   | 753.9161  | 1505.8177 | 1505.8203 | -1.69 | 0 | 36    | 0.0084  | 1    | 1 | G.GVGGVPGVGGVPGGGV.G                       |
| <a href="#">4782</a>  | 531 - 545   | 590.8207  | 1179.6268 | 1179.6248 | 1.66  | 0 | 24    | 0.14    | 1    | 1 | V.VGGVPGVGGVPGGGV.G                        |
| <a href="#">6806</a>  | 531 - 547   | 675.8700  | 1349.7254 | 1349.7304 | -3.66 | 0 | 30    | 0.057   | 1    | 1 | V.VGGVPGVGGVPGGGV.G                        |
| <a href="#">6914</a>  | 531 - 547   | 683.8712  | 1365.7278 | 1365.7253 | 1.80  | 0 | 34    | 0.016   | 1    | 1 | V.VGGVPGVGGVPGGGV.G + Oxidation(P)         |
| <a href="#">2843</a>  | 533 - 545   | 512.7759  | 1023.5373 | 1023.5350 | 2.32  | 0 | 22    | 0.1     | 1    | 1 | V.VGGVPGVGGVPGGGV.G                        |
| <a href="#">2844</a>  | 533 - 545   | 512.7760  | 1023.5374 | 1023.5350 | 2.43  | 0 | 21    | 0.46    | 2    | 1 | V.VGGVPGVGGVPGGGV.G                        |
| <a href="#">4908</a>  | 533 - 547   | 597.8282  | 1193.6418 | 1193.6405 | 1.12  | 0 | 31    | 0.033   | 2    | 1 | V.VGGVPGVGGVPGGGV.G                        |
| <a href="#">5212</a>  | 533 - 547   | 605.8267  | 1209.6388 | 1209.6354 | 2.78  | 0 | 32    | 0.065   | 1    | 1 | V.VGGVPGVGGVPGGGV.G + Oxidation(P)         |
| <a href="#">8958</a>  | 548 - 567   | 826.4163  | 1650.8181 | 1650.8214 | -1.98 | 0 | 24    | 0.083   | 2    | 1 | I.GTGPVGTGLVPGDILGGAGTAA.A                 |
| <a href="#">8962</a>  | 548 - 567   | 826.4176  | 1650.8207 | 1650.8214 | -0.43 | 0 | 44    | 0.0046  | 1    | 1 | I.GTGPVGTGLVPGDILGGAGTAA.A                 |
| <a href="#">8965</a>  | 548 - 567   | 826.4182  | 1650.8218 | 1650.8214 | 0.23  | 0 | 29    | 0.074   | 1    | 1 | I.GTGPVGTGLVPGDILGGAGTAA.A                 |
| <a href="#">8966</a>  | 548 - 567   | 826.4184  | 1650.8222 | 1650.8214 | 0.53  | 0 | 30    | 0.032   | 1    | 1 | I.GTGPVGTGLVPGDILGGAGTAA.A                 |
| <a href="#">8968</a>  | 548 - 567   | 826.4196  | 1650.8247 | 1650.8214 | 2.01  | 0 | 40    | 0.01    | 1    | 1 | I.GTGPVGTGLVPGDILGGAGTAA.A                 |
| <a href="#">2212</a>  | 585 - 596   | 484.2810  | 966.5475  | 966.5498  | -2.41 | 0 | 22    | 0.68    | 1    | 1 | A.AGLGAGVPLGLV.G                           |
| <a href="#">4088</a>  | 599 - 612   | 561.2714  | 1120.5283 | 1120.5302 | -1.70 | 0 | 40    | 0.009   | 1    | 1 | A.GVPGFAGAGAGGFGA.G                        |
| <a href="#">4089</a>  | 599 - 612   | 561.2714  | 1120.5283 | 1120.5302 | -1.70 | 0 | 33    | 0.064   | 1    | 1 | A.GVPGFAGAGAGGFGA.G                        |
| <a href="#">5684</a>  | 599 - 614   | 625.3021  | 1248.5896 | 1248.5888 | 0.64  | 0 | 51    | 0.00057 | 1    | 1 | A.GVPGFAGAGAGGFGA.G                        |
| <a href="#">7673</a>  | 608 - 626   | 751.8702  | 1501.7259 | 1501.7314 | -3.67 | 0 | 20    | 0.12    | 1    | 1 | A.GVPGFAGAGAGGFGA.G + S                    |
| <a href="#">2442</a>  | 615 - 626   | 493.2596  | 984.5046  | 984.5029  | 1.66  | 0 | 28    | 0.51    | 1    | 1 | A.GVPGFAGAGAVPG.S                          |
| <a href="#">11585</a> | 640 - 673   | 1278.6577 | 2555.3009 | 2555.2882 | 4.96  | 0 | 44    | 0.0019  | 1    | 1 | A.GGLGGVPGVGGVAG.G                         |
| <a href="#">7358</a>  | 655 - 673   | 726.8616  | 1451.7087 | 1451.7158 | -4.88 | 0 | 20    | 0.27    | 1    | 1 | L.GGGVGGVGGVGGV.G                          |
| <a href="#">1469</a>  | 664 - 675   | 457.2404  | 912.4662  | 912.4665  | -0.41 | 0 | 26    | 0.46    | 1    | 1 | P.GGLGGVPGVGGVAG.G + Oxidation(P)          |
| <a href="#">1470</a>  | 664 - 675   | 457.2410  | 912.4674  | 912.4665  | 0.99  | 0 | 27    | 0.63    | 1    | 1 | P.GGLGGVPGVGGVAG.G + Oxidation(P)          |
| <a href="#">2804</a>  | 692 - 703   | 510.7593  | 1019.5041 | 1019.5036 | 0.44  | 0 | 20    | 1.2     | 2    | 1 | A.QYGLGGAGGLGA.G                           |
| <a href="#">2807</a>  | 692 - 703   | 510.7595  | 1019.5044 | 1019.5036 | 0.74  | 0 | 69    | 0.00013 | 1    | 1 | A.QYGLGGAGGLGA.G                           |
| <a href="#">6953</a>  | 692 - 708   | 688.3527  | 1374.6909 | 1374.6892 | 1.24  | 0 | 51    | 0.015   | 1    | 1 | A.QYGLGGAGGLGAGGLGA.G                      |
| <a href="#">6954</a>  | 692 - 708   | 688.3538  | 1374.6931 | 1374.6892 | 2.83  | 0 | 60    | 0.0018  | 1    | 1 | A.QYGLGGAGGLGAGGLGA.G                      |
| <a href="#">9371</a>  | 692 - 713   | 865.9412  | 1729.8679 | 1729.8748 | -3.98 | 0 | 88    | 1.3e-06 | 1    | 1 | A.QYGLGGAGGLGAGGLGAGGLGA.G                 |
| <a href="#">9372</a>  | 692 - 713   | 865.9444  | 1729.8742 | 1729.8748 | -0.31 | 0 | 97    | 9.9e-07 | 1    | 1 | A.QYGLGGAGGLGAGGLGAGGLGA.G                 |
| <a href="#">9373</a>  | 692 - 713   | 865.9457  | 1729.8769 | 1729.8748 | 1.25  | 0 | 73    | 2.1e-05 | 1    | 1 | A.QYGLGGAGGLGAGGLGAGGLGA.G                 |
| <a href="#">9374</a>  | 692 - 713   | 865.9460  | 1729.8774 | 1729.8748 | 1.53  | 0 | 50    | 0.0053  | 1    | 1 | A.QYGLGGAGGLGAGGLGAGGLGA.G                 |
| <a href="#">10950</a> | 692 - 718   | 1043.5377 | 2085.0609 | 2085.0603 | 0.26  | 0 | 30    | 1.3     | 2    | 1 | A.QYGLGGAGGLGAGGLGAGGLGAGGLGA.G            |
| <a href="#">10951</a> | 692 - 718   | 1043.5381 | 2085.0616 | 2085.0603 | 0.61  | 0 | 27    | 0.03    | 1    | 1 | A.QYGLGGAGGLGAGGLGAGGLGAGGLGA.G            |
| <a href="#">11445</a> | 692 - 723   | 1221.1350 | 2440.2555 | 2440.2459 | 3.91  | 0 | 56    | 0.00021 | 1    | 1 | A.QYGLGGAGGLGAGGLGAGGLGAGGLGA.G            |
| <a href="#">3509</a>  | 694 - 708   | 542.7905  | 1083.5664 | 1083.5673 | -0.84 | 0 | 76    | 7.4e-05 | 1    | 1 | Y.GLGGAGGLGAGGLGA.G                        |
| <a href="#">2061</a>  | 699 - 711   | 478.7607  | 955.5068  | 955.5087  | -1.99 | 0 | 31    | 0.78    | 1    | 1 | A.GGLGAGGLGAGGLGA.G                        |
| <a href="#">3510</a>  | 699 - 713   | 542.7912  | 1083.5678 | 1083.5673 | 0.51  | 0 | 51    | 0.026   | 1    | 1 | A.GGLGAGGLGAGGLGA.G                        |
| <a href="#">7296</a>  | 699 - 718   | 720.3822  | 1438.7499 | 1438.7529 | -2.10 | 0 | 84    | 1e-06   | 1    | 1 | A.GGLGAGGLGAGGLGAGGLGA.G                   |
| <a href="#">9918</a>  | 699 - 723   | 897.9750  | 1793.9355 | 1793.9384 | -1.63 | 0 | 30    | 0.057   | 1    | 1 | A.GGLGAGGLGAGGLGAGGLGAGGLGA.G              |
| <a href="#">11289</a> | 704 - 734   | 1138.1134 | 2274.2123 | 2274.2081 | 1.83  | 0 | 47    | 0.0079  | 1    | 1 | A.GGLGAGGLGAGGLGAGGLGAGGLGAGGLGA.G         |
| <a href="#">10479</a> | 709 - 734   | 960.5215  | 1919.0285 | 1919.0225 | 3.13  | 0 | 27    | 0.087   | 1    | 1 | A.GGLGAGGLGAGGLGAGGLGAGGLGAGGLGA.G         |
| <a href="#">8132</a>  | 714 - 734   | 782.9227  | 1563.8308 | 1563.8369 | -3.94 | 0 | 42    | 0.0049  | 1    | 1 | A.GGLGAGGLGAGGLGAGGLGAGGLGAGGLGA.G         |
| <a href="#">8134</a>  | 714 - 734   | 782.9243  | 1563.8340 | 1563.8369 | -1.91 | 0 | 70    | 3.7e-05 | 1    | 1 | A.GGLGAGGLGAGGLGAGGLGAGGLGAGGLGA.G         |
| <a href="#">956</a>   | 735 - 744   | 414.2349  | 826.4552  | 826.4549  | 0.36  | 0 | 43    | 0.065   | 1    | 1 | G.AVGLGGVSPA.A                             |
| <a href="#">957</a>   | 735 - 744   | 414.2352  | 826.4558  | 826.4549  | 1.09  | 0 | 44    | 0.027   | 1    | 1 | G.AVGLGGVSPA.A                             |
| <a href="#">8810</a>  | 755 - 773   | 812.4511  | 1622.8875 | 1622.8893 | -1.08 | 0 | 27    | 0.074   | 1    | 1 | A.AGLGGVGLGARPPFPGGGVAA.R                  |
| <a href="#">4936</a>  | 756 - 768   | 599.3426  | 1196.6706 | 1196.6666 | 3.36  | 0 | 66    | 0.00022 | 1    | 1 | A.GLGGVGLGARPPFPGG.V                       |
| <a href="#">7168</a>  | 756 - 771   | 705.8929  | 1409.7713 | 1409.7780 | -4.70 | 0 | 41    | 0.0045  | 1    | 1 | A.GLGGVGLGARPPFPGGGV.A                     |
| <a href="#">7169</a>  | 756 - 771   | 705.8930  | 1409.7715 | 1409.7780 | -4.62 | 0 | 47    | 0.00057 | 1    | 1 | A.GLGGVGLGARPPFPGGGV.A                     |
| <a href="#">7170</a>  | 756 - 771   | 705.8931  | 1409.7717 | 1409.7780 | -4.45 | 0 | 57    | 8.9e-05 | 1    | 1 | A.GLGGVGLGARPPFPGGGV.A                     |
| <a href="#">7171</a>  | 756 - 771   | 705.8933  | 1409.7721 | 1409.7780 | -4.18 | 0 | 55    | 0.00036 | 1    | 1 | A.GLGGVGLGARPPFPGGGV.A                     |
| <a href="#">7597</a>  | 756 - 772   | 741.4111  | 1480.8077 | 1480.8151 | -4.97 | 0 | 50    | 0.00053 | 1    | 1 | A.GLGGVGLGARPPFPGGGVAA.A                   |
| <a href="#">7598</a>  | 756 - 772   | 741.4118  | 1480.8091 | 1480.8151 | -4.07 | 0 | 59    | 8.4e-05 | 1    | 1 | A.GLGGVGLGARPPFPGGGVAA.A                   |
| <a href="#">7599</a>  | 756 - 772   | 741.4127  | 1480.8109 | 1480.8151 | -2.83 | 0 | 36    | 0.012   | 1    | 1 | A.GLGGVGLGARPPFPGGGVAA.A                   |
| <a href="#">7600</a>  | 756 - 772   | 741.4131  | 1480.8116 | 1480.8151 | -2.34 | 0 | 21    | 0.15    | 1    | 1 | A.GLGGVGLGARPPFPGGGVAA.A                   |
| <a href="#">8023</a>  | 756 - 773   | 776.9296  | 1551.8446 | 1551.8522 | -4.90 | 0 | 48    | 0.0059  | 1    | 1 | A.GLGGVGLGARPPFPGGGVAA.R                   |
| <a href="#">8025</a>  | 756 - 773   | 776.9299  | 1551.8452 | 1551.8522 | -4.51 | 0 | 50    | 0.0014  | 1    | 1 | A.GLGGVGLGARPPFPGGGVAA.R                   |
| <a href="#">8027</a>  | 756 - 773   | 776.9300  | 1551.8454 | 1551.8522 | -4.35 | 0 | 55    | 0.00075 | 1    | 1 | A.GLGGVGLGARPPFPGGGVAA.R                   |
| <a href="#">8029</a>  | 756 - 773   | 776.9313  | 1551.8480 | 1551.8522 | -2.70 | 0 | 43    | 0.0031  | 1    | 1 | A.GLGGVGLGARPPFPGGGVAA.R                   |
| <a href="#">2894</a>  | 758 - 768   | 514.2888  | 1026.5630 | 1026.5611 | 1.83  | 0 | 31    | 0.028   | 1    | 1 | L.GGVLGARPPFPGG.V                          |
| <a href="#">5605</a>  | 758 - 771   | 620.8426  | 1239.6706 | 1239.6724 | -1.46 | 0 | 32    | 0.081   | 1    | 1 | L.GGVLGARPPFPGGGV.A                        |
| <a href="#">5609</a>  | 758 - 771   | 620.8433  | 1239.6720 | 1239.6724 | -0.38 | 0 | 45    | 0.0022  | 1    | 1 | L.GGVLGARPPFPGGGV.A                        |
| <a href="#">6545</a>  | 758 - 772   | 656.3605  | 1310.7064 | 1310.7095 | -2.41 | 0 | 26    | 0.14    | 1    | 1 | L.GGVLGARPPFPGGGVAA.A                      |
| <a href="#">6546</a>  | 758 - 772   | 656.3643  | 1310.7140 | 1310.7095 | 3.37  | 0 | 30    | 0.049   | 1    | 1 | L.GGVLGARPPFPGGGVAA.A                      |
| <a href="#">7019</a>  | 758 - 773   | 691.8801  | 1381.7456 | 1381.7467 | -0.78 | 0 | 26    | 0.044   | 1    | 1 | L.GGVLGARPPFPGGGVAA.R                      |
| <a href="#">7020</a>  | 758 - 773   | 691.8815  | 1381.7485 | 1381.7467 | 1.34  | 0 | 21    | 0.22    | 1    | 1 | L.GGVLGARPPFPGGGVAA.R                      |
| <a href="#">649</a>   | 764 - 771   | 393.7151  | 785.4157  | 785.4184  | -3.51 | 0 | 25    | 0.088   | 1    | 1 | A.RPPFPGGGV.A                              |
| <a href="#">651</a>   | 764 - 771   | 393.7161  | 785.4176  | 785.4184  | -1.10 | 0 | 22    | 0.2     | 1    | 1 | A.RPPFPGGGV.A                              |
| <a href="#">652</a>   | 764 - 771   | 393.7161  | 785.4176  | 785.4184  | -1.10 | 0 | 25    | 2.7     | 3    | 1 | A.RPPFPGGGV.A                              |
| <a href="#">653</a>   | 764 - 771   | 393.7162  | 785.4178  | 785.4184  | -0.79 | 0 | 28    | 0.13    | 1    | 1 | A.RPPFPGGGV.A                              |

| Query                 | Start - End | Observed | Mr(expt)  | Mr(calc)  | ppm   | M Score | Expect | Rank | W | Peptide                    |
|-----------------------|-------------|----------|-----------|-----------|-------|---------|--------|------|---|----------------------------|
| <a href="#">9459</a>  | 773 - 791   | 872.4613 | 1742.9081 | 1742.9104 | -1.35 | 37      | 0.0052 | 1    | U | A..ARPGFGLSPIYPGGGAGGL.G   |
| <a href="#">10413</a> | 773 - 793   | 950.5074 | 1899.0003 | 1899.0003 | 0.018 | 27      | 0.071  | 1    | U | A..ARPGFGLSPIYPGGGAGGLGV.G |
| <a href="#">1866</a>  | 774 - 782   | 472.2721 | 942.5296  | 942.5287  | 0.99  | 21      | 1.2    | 2    | U | A..RPGFGLSPI.Y             |
| <a href="#">9113</a>  | 774 - 791   | 836.9426 | 1671.8706 | 1671.8733 | -1.63 | 21      | 0.7    | 1    | U | A..RPGFGLSPIYPGGGAGGL.G    |
| <a href="#">10156</a> | 774 - 793   | 914.9898 | 1827.9651 | 1827.9632 | 1.02  | 47      | 0.0044 | 1    | U | A..RPGFGLSPIYPGGGAGGLGV.G  |
| <a href="#">10157</a> | 774 - 793   | 914.9901 | 1827.9655 | 1827.9632 | 1.29  | 60      | 0.0027 | 1    | U | A..RPGFGLSPIYPGGGAGGLGV.G  |

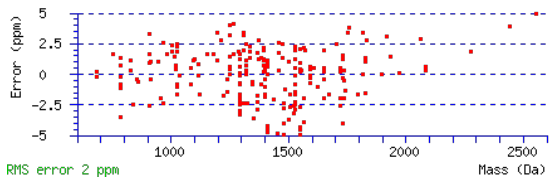

Mascot: <http://www.matrixscience.com/>
